# Supplementary material
Source: Springer Nature journal article supplement (https://www.springermedizin.de/resource/supplementary/12894_2013_283_MOESM1_ESM.pdf/9513374)
Supplement: MOESM1 [file 9513374]

85238 citations through  
database searching

46824 citations  
reporting on prostatic  
neoplasms

19152 citations  
reporting on kidney  
neoplasms

13736 citations  
reporting on urinary  
bladder neoplasms

5526 citations  
reporting on testicular  
neoplasms

Narrowing of 46824  
citations using a  
limitation function  
provided by MEDLINE  
(,publication type')

Narrowing of 19152  
citations using a  
limitation function  
provided by MEDLINE  
(,publication type')

Narrowing of 13736  
citations using a  
limitation function  
provided by MEDLINE  
(,publication type')

Narrowing of 5526  
citations using a  
limitation function  
provided by MEDLINE  
(,publication type')

1404 citations indexed  
as RCTs

129 citations indexed  
as CCTs

263 citations indexed  
as MAs

2232 citations indexed  
as CRs

193 citations indexed  
as RCTs

30 citations indexed  
as CCTs

66 citations indexed  
as MAs

6013 citations indexed  
as CRs

249 citations indexed  
as RCTs

41 citations indexed  
as CCTs

128 citations indexed  
as MAs

2304 citations indexed  
as CRs

39 citations indexed  
as RCTs

6 citations indexed  
as CCTs

30 citations indexed  
as MAs

1817 citations indexed  
as CRs
